# Supplementary material for: Using geometric simulation software ‘GASP’ to model conformational flexibility in a family of zinc metal–organic frameworks
Source: Royal Society of Chemistry journal article supplement (doi:10.1039/d1nj01158h), 2021-01-01
Supplement: d1nj01158h1.pdf [file d1nj01158h1.pdf]

# Using geometric simulation software ‘GASP’ to model conformational flexibility in a family of zinc metal-organic frameworks

William J. Gee,<sup>[a]</sup> Stephen A. Wells,<sup>[b]</sup> Simon J. Teat,<sup>[c]</sup> Paul R. Raithby,<sup>[d]</sup> and  
Andrew D. Burrows\*<sup>[d]</sup>

- a) School of Environment and Science, Griffith University, 170 Kessels Road, Brisbane, QLD 4111, Australia.
- b) Department of Chemical Engineering, University of Bath, Claverton Down, Bath, BA2 7AY, United Kingdom
- c) Advanced Light Source, Lawrence Berkeley National Laboratory, Berkeley, CA, USA.
- d) Department of Chemistry, University of Bath, Claverton Down, Bath, BA2 7AY, United Kingdom. Email: [a.d.burrows@bath.ac.uk](mailto:a.d.burrows@bath.ac.uk).

## Supporting Information

\* To whom correspondence should be addressed.

Email: [a.d.burrows@bath.ac.uk](mailto:a.d.burrows@bath.ac.uk)

Telephone: +44 (0) 1225 386529

## Table of Contents

|                                                                                                   |     |
|---------------------------------------------------------------------------------------------------|-----|
| 1. Accurate mass spectrometry performed on the reaction mixture post H <sub>3</sub> cbt formation | S3  |
| 2. <sup>1</sup> H-NMR spectrum of ligand H <sub>3</sub> cbt in DMSO-d <sup>6</sup>                | S4  |
| 3. Crystal data table for <b>1–3</b>                                                              | S5  |
| 4. H-bonding environment about the nonbonding Hcbt arm in <b>1–3</b>                              | S6  |
| 5. TGA traces of <b>1</b> and <b>2</b>                                                            | S8  |
| 6. PXRD analysis of compounds <b>1</b> and <b>2</b>                                               | S9  |
| 7. Comparison of experimental PXRD pattern of <b>1</b> to predicted pattern of <b>3</b> .         | S10 |
| 8. Tolerance of <b>1</b> to immersion in water for twelve hours                                   | S11 |
| 9. Influence of activation on frameworks <b>1</b> and <b>2</b> assessed by PXRD                   | S12 |

## 1. Accurate mass spectrometry performed on the reaction mixture post H<sub>3</sub>cbt formation

+MS, 1.0-1.3min #(47-60), -Spectral Bkgrnd

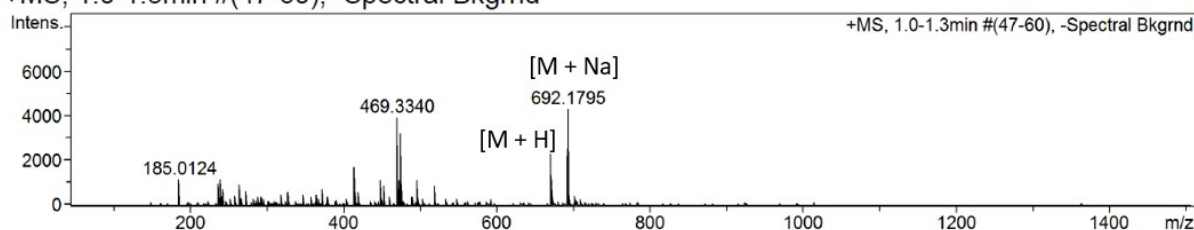

| #  | m/z      | I    | I %   | Area | S/N    |
|----|----------|------|-------|------|--------|
| 1  | 185.0124 | 1179 | 27.4  | 29   | 3602.7 |
| 2  | 239.0221 | 1140 | 26.5  | 43   | 1218.1 |
| 3  | 413.2697 | 1705 | 39.7  | 56   | 479.7  |
| 4  | 469.3340 | 3937 | 91.6  | 155  | 809.8  |
| 5  | 472.1151 | 1113 | 25.9  | 82   | 225.9  |
| 6  | 474.1297 | 3222 | 74.9  | 256  | 647.8  |
| 7  | 670.1946 | 2302 | 53.5  | 276  | 337.5  |
| 8  | 671.1987 | 1132 | 26.3  | 128  | 165.0  |
| 9  | 692.1795 | 4300 | 100.0 | 502  | 653.6  |
| 10 | 693.1800 | 2117 | 49.2  | 238  | 323.6  |

### Generate Molecular Formula Parameters

| Charge   | Tolerance | SearchRadius | H/C Ratio min. | H/C Ratio max. | Electron Conf. | Nitrogen Rule | sigma limit |
|----------|-----------|--------------|----------------|----------------|----------------|---------------|-------------|
| positive | 10 ppm    | 0.05 m/z     | 0              | 3              | both           | true          | 0.05        |

Expected Formula C<sub>42</sub>H<sub>27</sub>N<sub>3</sub>O<sub>6</sub> Adduct(s): H, Na

| # | meas. m/z | theo. m/z  | Err[ppm] | Sigma  | Formula                                                                       |
|---|-----------|------------|----------|--------|-------------------------------------------------------------------------------|
| 1 | 670.1946  | 670.197811 | 4.00     | 0.0248 | C <sub>42</sub> H <sub>28</sub> N <sub>3</sub> O <sub>6</sub>                 |
| 1 | 692.1795  | 692.179755 | -0.50    | 0.0184 | C <sub>42</sub> H <sub>27</sub> N <sub>3</sub> Na <sub>1</sub> O <sub>6</sub> |

The reaction mixture during H<sub>3</sub>c**bt** formation was analysed by mass spectrometry after microwave heating had concluded to assess the oxidation of the dihydropyridine. Both the [M+H]<sup>+</sup> and [M+Na]<sup>+</sup> ions were present in the crude mixture, as well as trace amounts of aldol product shown below. The peak at 474 m/z can be attributed to reduction of the aldol intermediate to balance oxidation of the dihydropyridine. Imine formation of the aldol carboxylic acids / ketone groups derived from aqueous ammonia could account for the peak at 469 m/z.

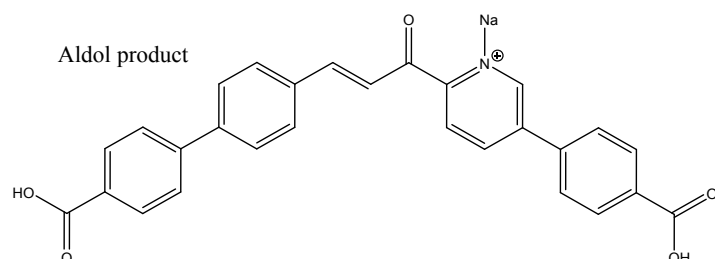

m/z: 472.1155 (100.0%), 473.1189 (30.3%), 474.1223 (2.7%), 474.1223 (1.7%), 474.1198 (1.0%)

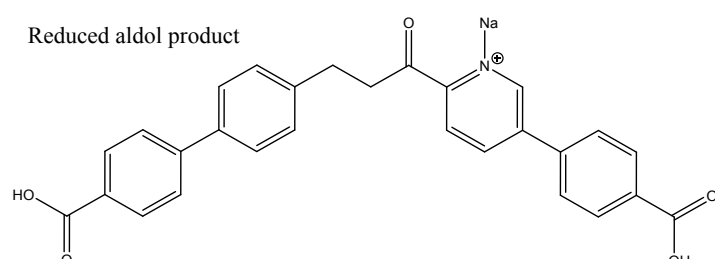

m/z: 474.1312 (100.0%), 475.1345 (30.3%), 476.1379 (2.7%), 476.1379 (1.7%), 476.1354 (1.0%)

## 2. $^1\text{H-NMR}$ spectrum of ligand $\text{H}_3\text{cbt}$ in $\text{DMSO-d}_6$

Expanded Region of Interest:

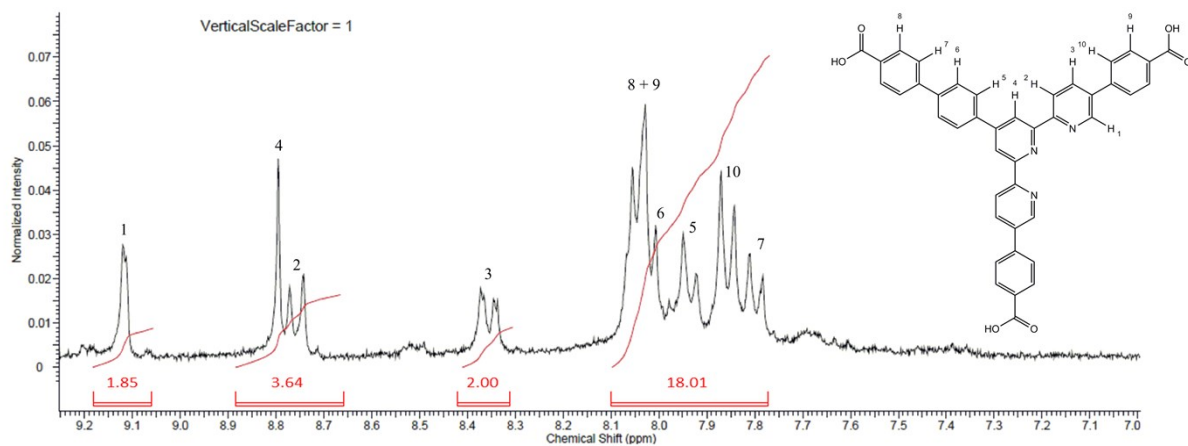

Mid-range view:

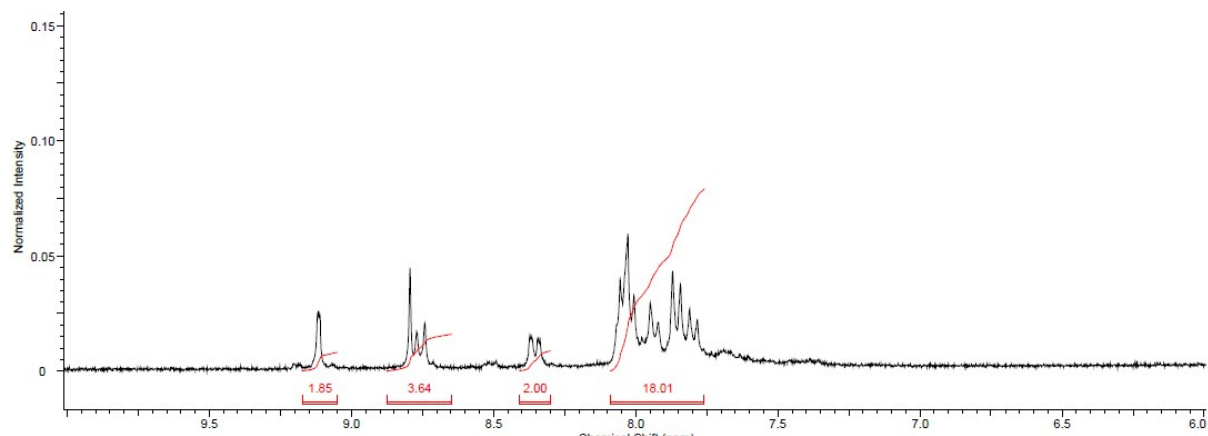

Full Spectrum:

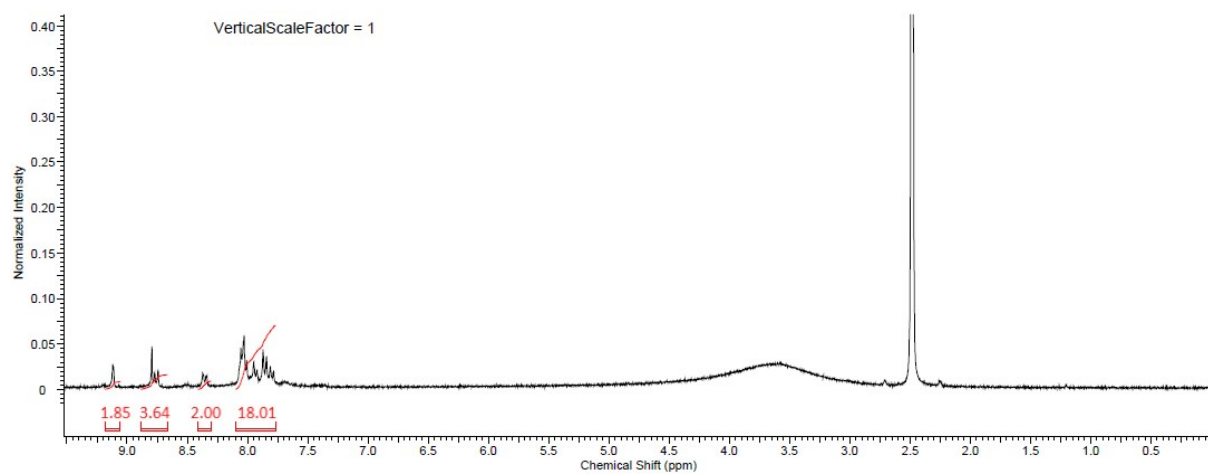

### 3. Crystal data table for 1–3:

| Identification code               | 1                                                                 | 2                                                                                               | 3                                                                 |
|-----------------------------------|-------------------------------------------------------------------|-------------------------------------------------------------------------------------------------|-------------------------------------------------------------------|
| Empirical formula                 | C <sub>53</sub> H <sub>42</sub> N <sub>7</sub> O <sub>10</sub> Zn | C <sub>106</sub> H <sub>100</sub> N <sub>8</sub> O <sub>25</sub> S <sub>8</sub> Zn <sub>2</sub> | C <sub>48</sub> H <sub>24</sub> N <sub>5</sub> O <sub>11</sub> Zn |
| Formula weight                    | 1002.3                                                            | 2273.15                                                                                         | 912.09                                                            |
| Temperature                       | 150(2) K                                                          | 150(2) K                                                                                        | 150(2) K                                                          |
| Wavelength                        | 0.71073 Å                                                         | 0.71073 Å                                                                                       | 0.71073 Å                                                         |
| Crystal system                    | Monoclinic                                                        | Monoclinic                                                                                      | Monoclinic                                                        |
| Space group                       | P 21/n                                                            | P 21/c                                                                                          | P 21/n                                                            |
| Unit cell dimensions              | a = 16.5565(17) Å                                                 | a = 15.823(4) Å                                                                                 | a = 17.733(5) Å                                                   |
|                                   | b = 14.5139(15) Å                                                 | b = 16.228(5) Å                                                                                 | b = 11.753(3) Å                                                   |
|                                   | c = 21.112(2) Å                                                   | c = 22.530(6) Å                                                                                 | c = 22.790(6) Å                                                   |
|                                   | α = 90°.                                                          | α = 90°.                                                                                        | α = 90°.                                                          |
|                                   | β = 104.938(2)°.                                                  | β = 108.133(4)°.                                                                                | β = 96.427(4)°.                                                   |
|                                   | γ = 90°.                                                          | γ = 90°.                                                                                        | γ = 90°.                                                          |
| Volume                            | 4901.8(9) Å <sup>3</sup>                                          | 5498(3) Å <sup>3</sup>                                                                          | 4720(2) Å <sup>3</sup>                                            |
| Z                                 | 4                                                                 | 2                                                                                               | 4                                                                 |
| Density (calculated)              | 1.358 Mg/m <sup>3</sup>                                           | 1.373 Mg/m <sup>3</sup>                                                                         | 1.284 Mg/m <sup>3</sup>                                           |
| Absorption coefficient            | 0.568 mm <sup>-1</sup>                                            | 0.663 mm <sup>-1</sup>                                                                          | 0.584 mm <sup>-1</sup>                                            |
| F(000)                            | 2076                                                              | 2360                                                                                            | 1860                                                              |
| Crystal size                      | 0.2 x 0.2 x 0.1 mm <sup>3</sup>                                   | 0.3 x 0.2 x 0.2 mm <sup>3</sup>                                                                 | 0.4 x 0.2 x 0.2 mm <sup>3</sup>                                   |
| Theta range for data collection   | 2.503 to 31.676°.                                                 | 2.657 to 20.729°.                                                                               | 2.666 to 23.308°.                                                 |
| Index ranges                      | -24 ≤ h ≤ 24, -21 ≤ k ≤ 20, -30 ≤ l ≤ 30                          | -15 ≤ h ≤ 15, -16 ≤ k ≤ 16, -22 ≤ l ≤ 22                                                        | -19 ≤ h ≤ 19, -13 ≤ k ≤ 13, -25 ≤ l ≤ 25                          |
| Reflections collected             | 72286                                                             | 25904                                                                                           | 38697                                                             |
| Independent reflections           | 15845 [R <sub>(int)</sub> = 0.0695]                               | 5654 [R <sub>(int)</sub> = 0.1108]                                                              | 6786 [R <sub>(int)</sub> = 0.0559]                                |
| Completeness to theta = 25.000°   | 99.50%                                                            | 99.30%                                                                                          | 99.50%                                                            |
| Absorption correction             | Semi-empirical from equivalents                                   | None                                                                                            | Semi-empirical from equivalents                                   |
| Max. and min. transmission        | 0.7313 and 0.6864                                                 |                                                                                                 | 0.7452 and 0.6517                                                 |
| Refinement method                 | Full-matrix least-squares on F <sub>2</sub>                       | Full-matrix least-squares on F <sub>2</sub>                                                     | Full-matrix least-squares on F <sub>2</sub>                       |
| Data / restraints / parameters    | 15845 / 5 / 646                                                   | 5654 / 10 / 629                                                                                 | 6786 / 20 / 539                                                   |
| Goodness-of-fit on F <sub>2</sub> | 1.037                                                             | 1.047                                                                                           | 1.089                                                             |
| Final R indices [I > 2σ(I)]       | R <sub>1</sub> = 0.0635, wR <sub>2</sub> = 0.1845                 | R <sub>1</sub> = 0.1087, wR <sub>2</sub> = 0.2802                                               | R <sub>1</sub> = 0.1037, wR <sub>2</sub> = 0.3004                 |
| R indices (all data)              | R <sub>1</sub> = 0.0754, wR <sub>2</sub> = 0.1957                 | R <sub>1</sub> = 0.1583, wR <sub>2</sub> = 0.3224                                               | R <sub>1</sub> = 0.1249, wR <sub>2</sub> = 0.3220                 |
| Largest diff. peak and hole       | 1.535 and -0.717 e.Å <sup>-3</sup>                                | 2.359 and -1.066 e.Å <sup>-3</sup>                                                              | 1.699 and -0.952 e.Å <sup>-3</sup>                                |

#### 4. H-bonding environment about the nonbonding Hcvt arm in 1-3.

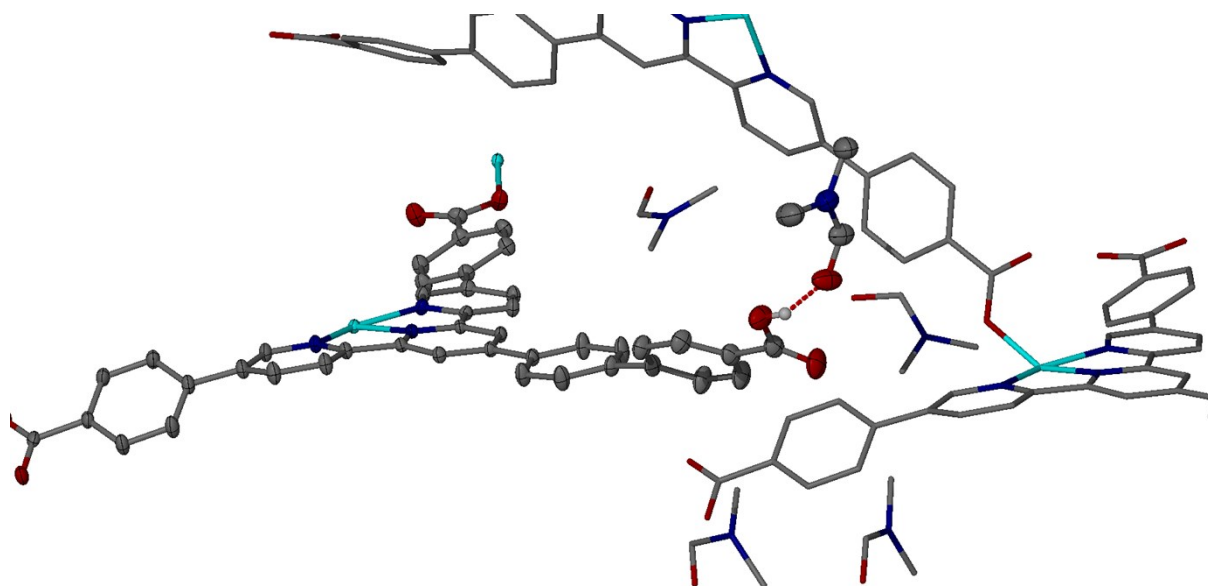

**Structure 1:** Ligand H-bonding observed in **1** to a molecule of DMF which orders the remaining solvent molecules within the channel. Inter-oxygen hydrogen-bond length is 2.636(3) Å

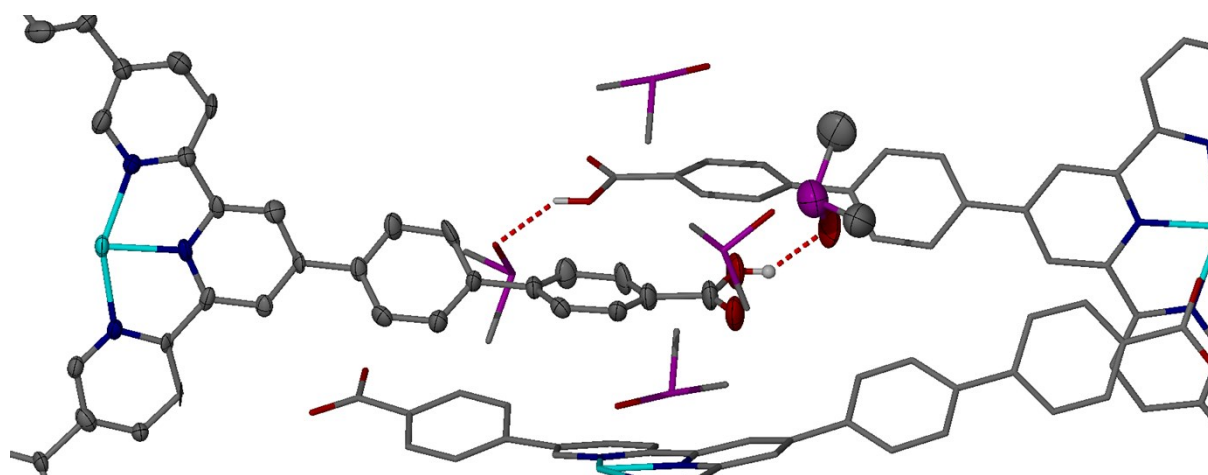

**Structure 2:** Ligand H-bonding observed in **2** to a molecule of DMSO which orders the remaining solvent molecules within the channel. The inter-oxygen hydrogen-bond length is 2.626(15) Å

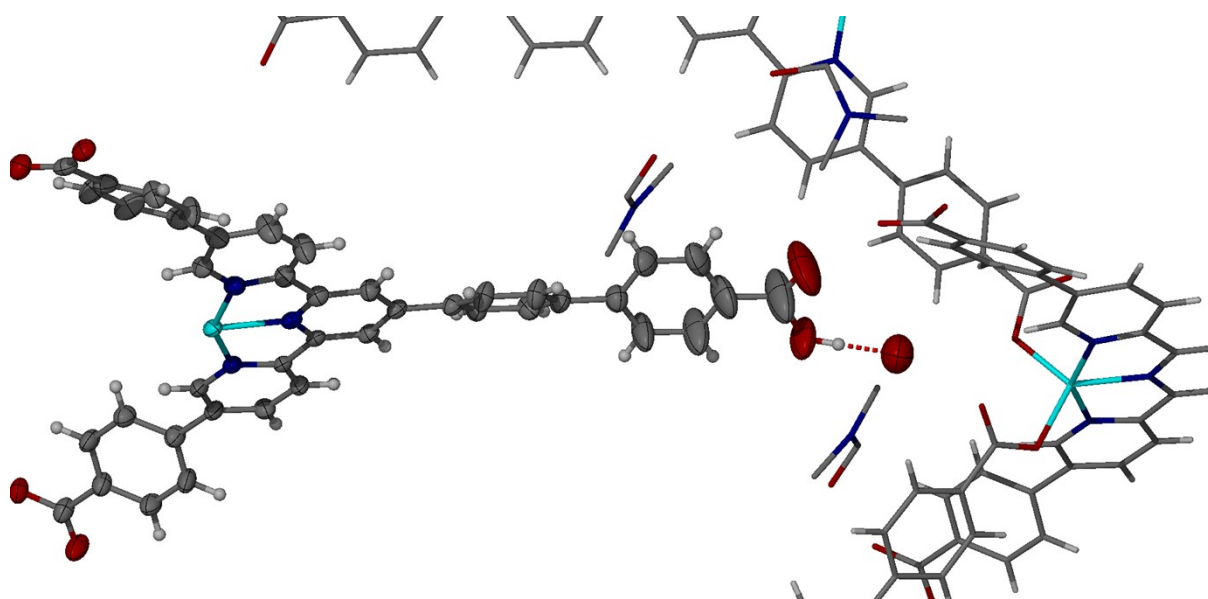

**Structure 3:** Ligand H-bonding observed in **3** to a water molecule which partially orders the remaining solvent molecules within the channel. The inter-oxygen hydrogen-bond length is 2.616(14) Å

## 5. TGA traces of 1 and 2.

*TGA trace of 1.*

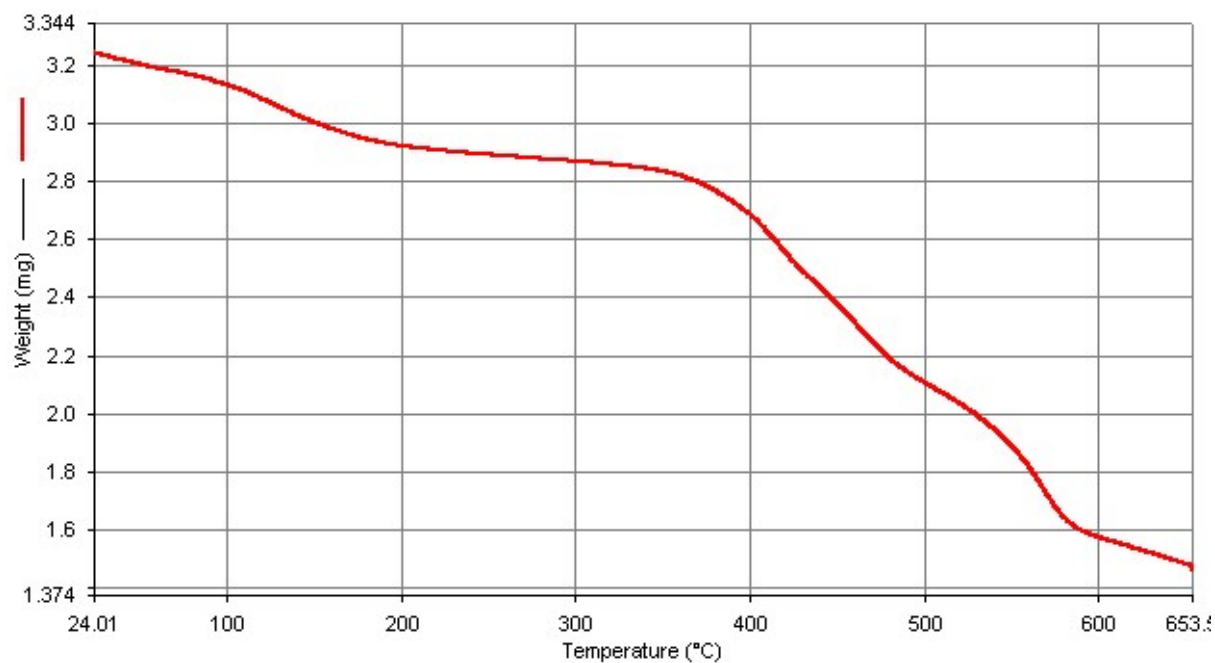

*TGA trace of 2.*

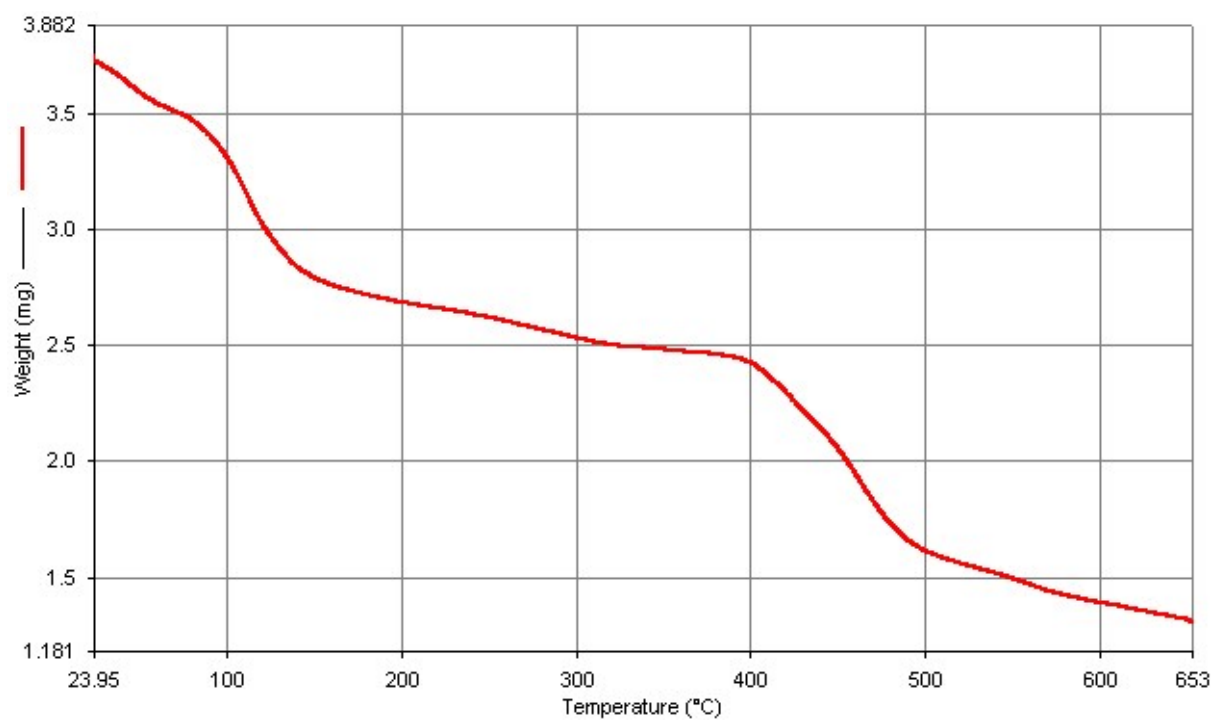



## 6. PXRD analysis of compounds 1 and 2.

### [Zn(Hcbt)]<sub>n</sub>·4DMF (1)

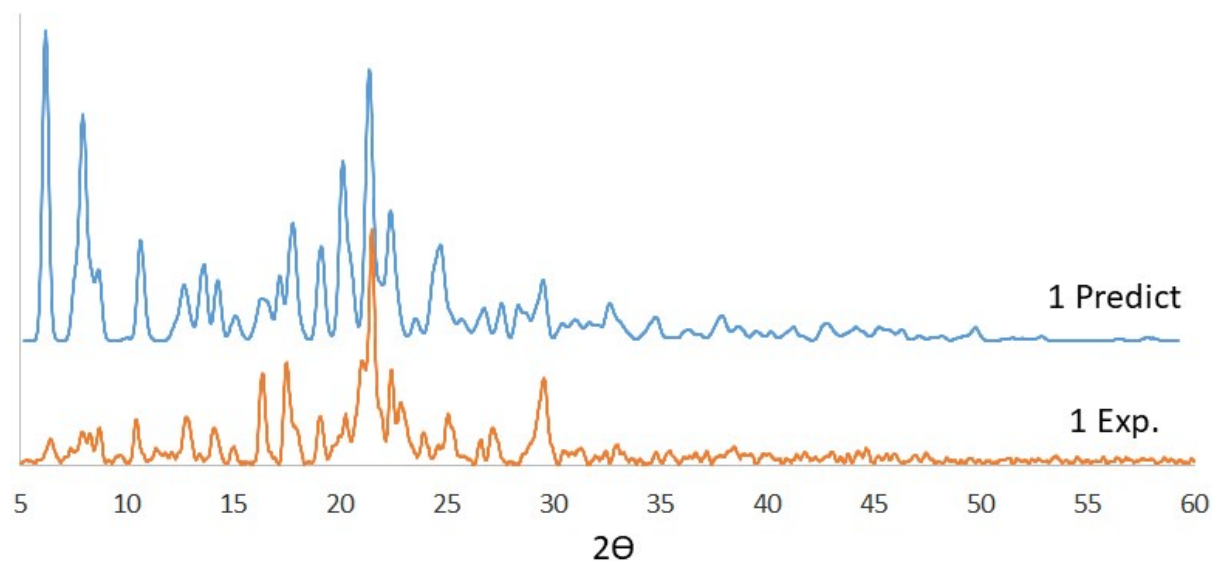

Some minor variation in peak positions, particularly at lower 2θ values, are likely due to the mismatch between collection temperatures between the powder data (room temp.) and crystal data used for collection (150 K), coupled with the propensity of the material to desolvate triggering changes in conformation (see TGA in S4).

### [Zn(Hcbt)]<sub>n</sub>·4DMSO·1.5H<sub>2</sub>O·DMF (2)

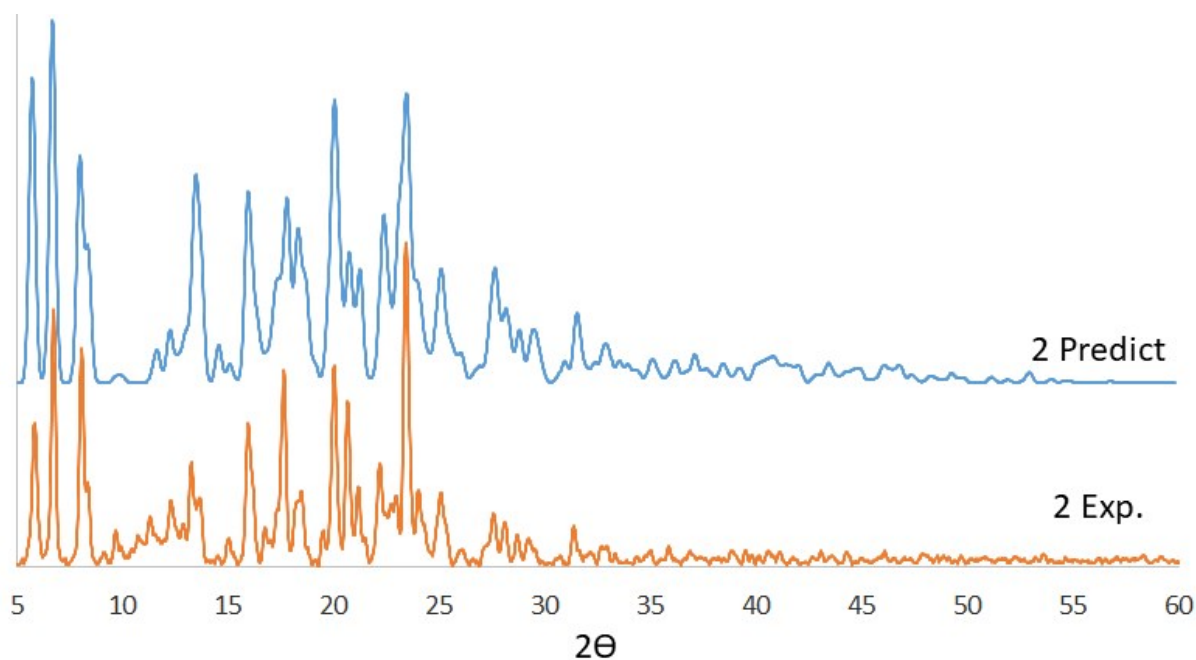

## 7. Comparison of experimental PXRD pattern of **1** to predicted pattern of **3**.

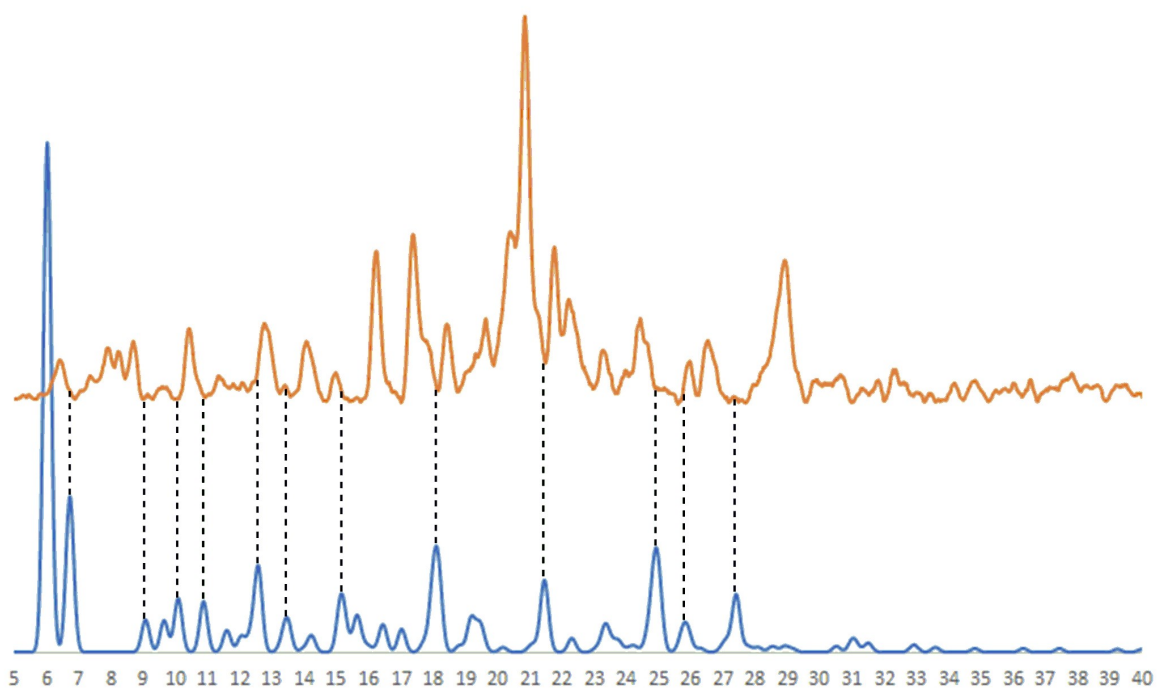

A comparison of the predicted PXRD pattern for **3** (bottom, blue trace) to the experimental PXRD pattern obtained for **1** using dry DMF (top, orange trace). In most instances the peaks for **3** correspond to troughs in **1**, highlighting that a negligible amount of **3** is present within **1** when dry DMF is used during synthesis.

**8: Tolerance of 1 to immersion in water for twelve hours.**

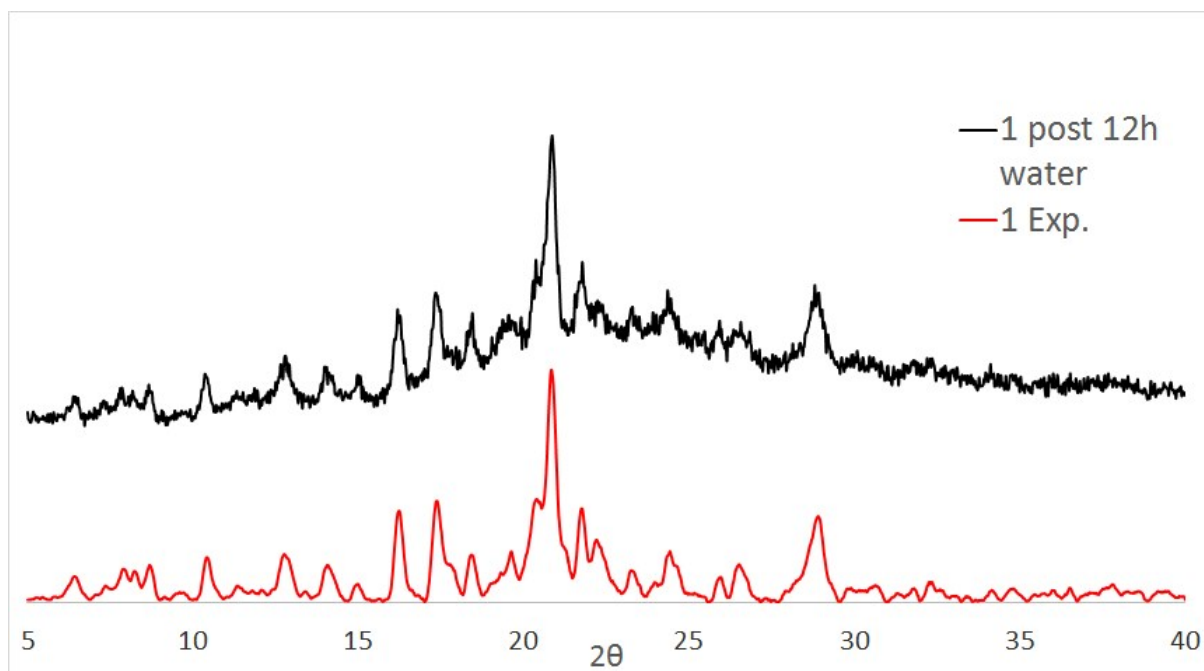

Despite being suspended in water for a period of 12 hours, framework **1** gave no evidence of interconversion to a hydrated motif (e.g. **3**). This finding provides experimental validity for a topological barrier preventing interconversion between the neat DMF motif (**1**) and the hydrated motif (**3**) identified by GASP.

### 9: Influence of activation on frameworks 1 and 2 assessed by PXRD.

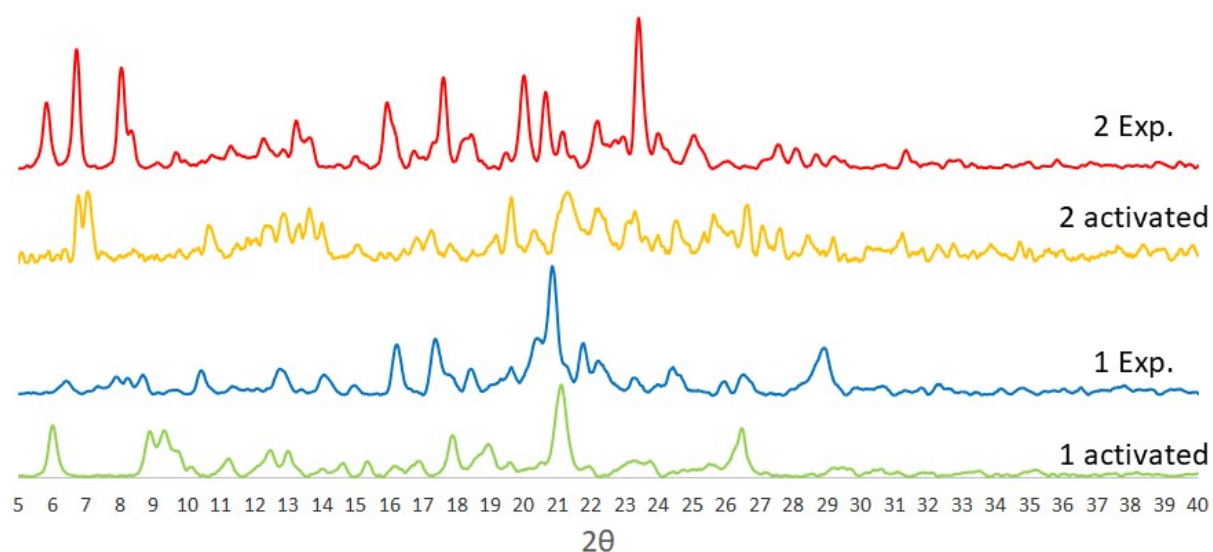

A comparison of how activation (heating at 150 °C under high vacuum for 8 hours) impacted the PXRD pattern of MOFs **1** and **2**. Both structures retain crystallinity upon desolvation, however new PXRD patterns for each were observed. Conformational changes to minimise pore volume as predicted by GASP serve to explain the changes in pattern. It should also be noted that upon activation the two frameworks remain structurally distinct from one another, consistent with GASP inferences of a barrier to interconversion between the two motifs.
